# Supplementary material for: In silico synchronization reveals regulators of nuclear ruptures in lamin A/C deficient model cells
Source: PubMed Central journal article supplement (PMC4962089; doi:10.1038/srep30325), 2016-07-27
Supplement: srep30325-s1.pdf [file srep30325-s1.pdf]

## **SUPPLEMENTARY INFORMATION**

### ***In silico* synchronization reveals regulators of nuclear ruptures in lamin A/C deficient model cells**

J. Robijns<sup>1</sup>, F. Molenberghs<sup>1</sup>, T. Sieprath<sup>1,2</sup>, T. Corne<sup>1,2</sup>, M. Verschuuren<sup>1</sup> and W. H. De Vos<sup>1,2\*</sup>

<sup>1</sup> Laboratory of Cell Biology and Histology, Department of Veterinary Sciences, University of Antwerp, Antwerp, Belgium

<sup>2</sup> Cell Systems and Imaging Research Group (CSI), Department of Molecular Biotechnology, Ghent University, Ghent, Belgium

#### **Content**

- Supplementary Table p. 2
- Supplementary Figures p. 3
- Supplementary Movie Legends p. 11

**Supplementary Table 1.** Predicted off-target sites for the *LMNA* and *ZMPSTE24* knockout gRNA with corresponding primers

|                 |   | <b>Off Target sequence (5'-3')</b> | <b>Forward primer (5'-3')</b> | <b>Reverse primer (5'-3')</b> |
|-----------------|---|------------------------------------|-------------------------------|-------------------------------|
| <b>LMNA</b>     | 1 | CTGGAGACTGGGTGATGCGCAGG            | TTGTCCAGGTAGGTGGTGGT          | GGTGGTGATGTCGCTGTTT           |
|                 | 2 | TTGCAGAGTCGGTGATGCTATGG            | CGTGCATGGGAGTGTACTTG          | ATGTCTGCTGGGGACTGAAT          |
|                 | 3 | CCTCAGACAGGATGATGCGATAG            | CTCGTCAAGGTAGGGAAGTGA         | CCCTTCGCTCTTTCTCTCTG          |
|                 | 4 | CCACAGACTCACTGATGCGAAGG            | ACGGGAAACAACACCATCAG          | GCTGAATGCCTAAGCTGGAG          |
|                 | 5 | CTTCAGACAGGGTGATGTGAAAAG           | AGGATGATAGTCCCGAAGCA          | GGGAGGAAATCAAATCAGCA          |
| <b>ZMPSTE24</b> | 1 | GTCTGATAAGCGTATCTTCCAG             | TGCGTCACACTTTAGCATGTC         | AACAGAAAGCTGCCGTGACT          |
|                 | 2 | GGGTGAGAAGGGTATCTTCCGGG            | GTCAGGAAAGCTCAGGCAAG          | CACAAAGCGGTCTCTCCACT          |
|                 | 3 | GGCAGAGAAACATATCTTCATGG            | TTCCAGAGGATGGGTGAGAC          | TCTATCGTTGTTGGGCCTTT          |
|                 | 4 | GTCCGAGAACAGTATCTTTGTGG            | TACCGTGCTTCTGCTGACAT          | CAGGAAAGAAACCCCTGACA          |

## Supplementary Figures

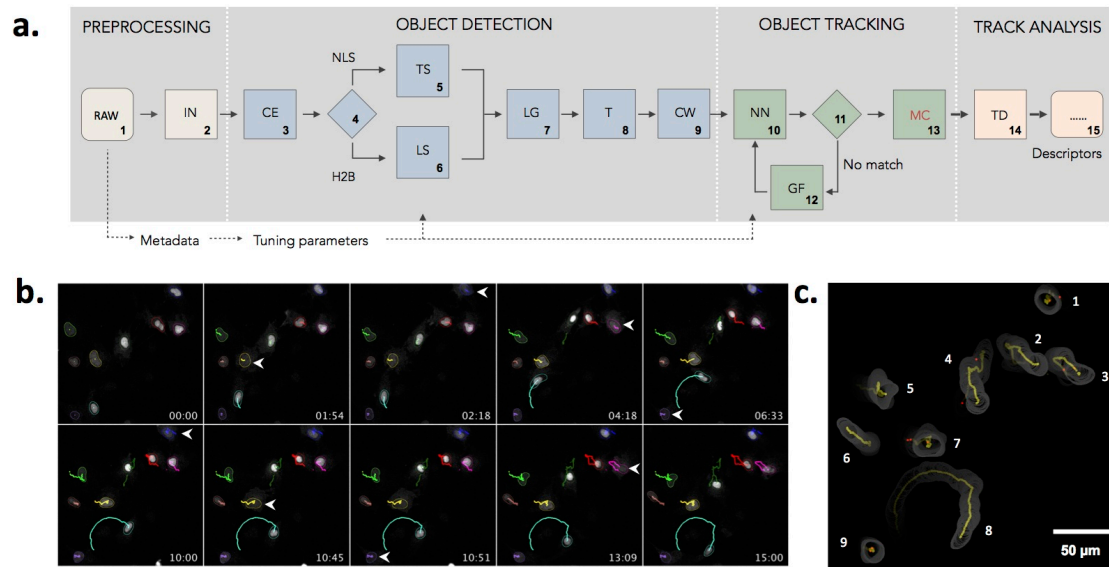

**Figure S1. Analysis of spontaneous nuclear ruptures.** (a) Image analysis workflow. See Materials and Methods section for more details (IN: intensity normalization, CE: local contrast enhancement, TS: temporal smoothing, LS: lateral smoothing, LG: Laplacian of Gaussian, T: threshold, CW: conditional watershed, NN: nearest neighbor assignment, GF: gap fill, MC: manual curation, TD: track detection); (b) Example result of nuclei tracking in an image data set of MEF-LKO cells, with individually tracked nuclei outlined in distinct colors and superimposed with their resp. tracks. Rupture events are indicated with white arrowheads; (c) Time-projection of the nuclear outlines of the time series in b, superimposed with their respective tracks in yellow. Rupture events are indicated as red dots on the tracks.

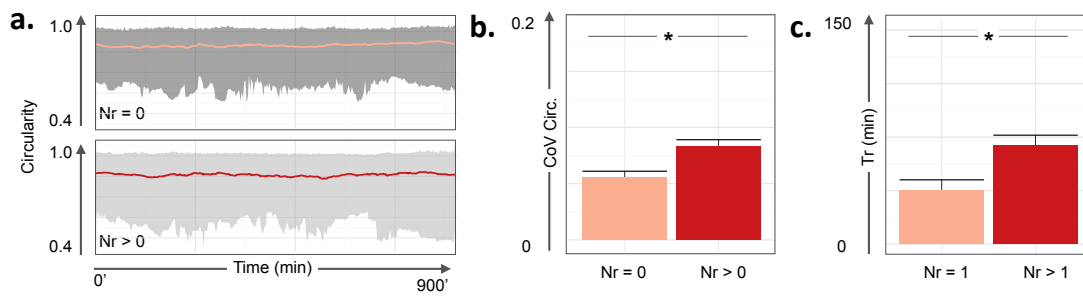

**Figure S2. Rupture frequency correlates with nuclear plasticity and repair halftime in MEF-LKO cells** (a) MEF-LKO nuclei that experience nuclear ruptures ( $Nr > 0$ ) in a 15 h time span show larger nuclear circularity fluctuations than nuclei that do not ( $Nr = 0$ ), as shown by the larger range across time (grey); (b) this results in a significantly ( $p < 0.001$ ) larger coefficient of variation (CoV) for the circularity across time for rupture-prone cells; (c) The repair halftime is significantly ( $p < 0.001$ ) larger for nuclei that experience multiple ruptures ( $Nr > 1$ ), than for nuclei that experience only one rupture event in 15 h. Bar graphs reflect mean  $\pm$  standard error ( $n = 218$  tracks).

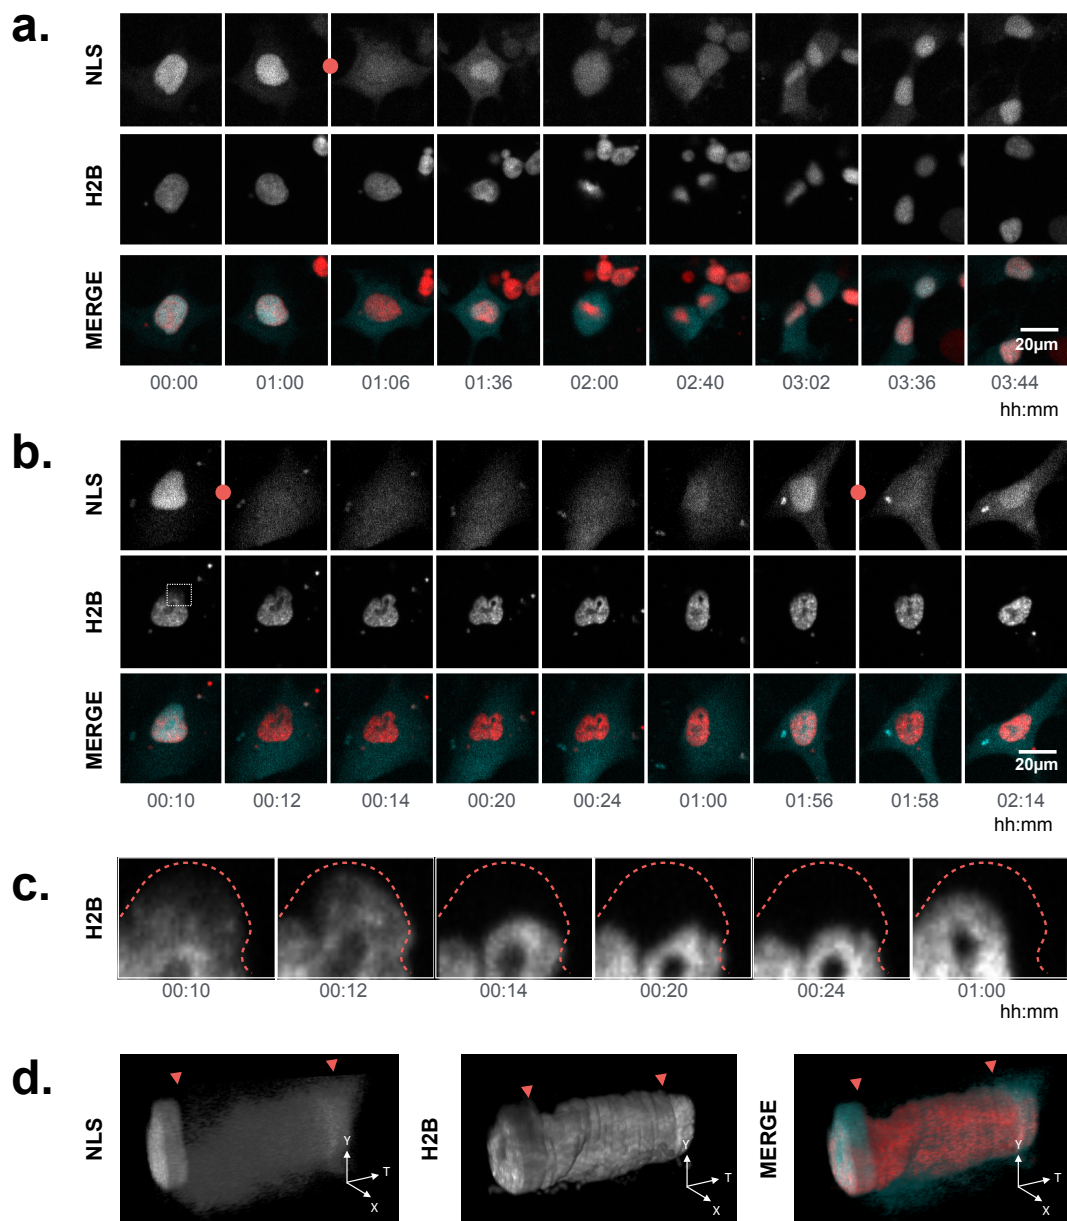

**Figure S3. Nuclear ruptures in HT-LKO cells are not lethal and are accompanied by local chromatin condensation** (a) Montage of an HT-LKO (L2) cell transfected with H2B-GFP and NLS-mCherry successfully progressing through mitosis after undergoing a rupture event (red dot, 01h:06m). Selected time points of individual channels are shown in grayscale and as merge in red (NLS) and cyan (H2B); (b) Montage of an L2 HT-LKO cell transfected with H2B-GFP (cyan) and NLS-mCherry (red), undergoing repetitive rupture events (red dots) and local chromatin deformation

after the first nuclear rupture; (c) Magnified view of the rectangular region indicated in b superimposed with the outlines of the pre-rupture nuclear shape (00h:10m). Local deformation of the nucleus is accompanied by chromatin condensation, as shown by the concomitant increase in H2B signal intensity; (d) XYT kymographs showing the pronounced deformation after the first nuclear rupture (red arrowhead) and the subsequent local increase in H2B signal intensity reflecting chromatin condensation.

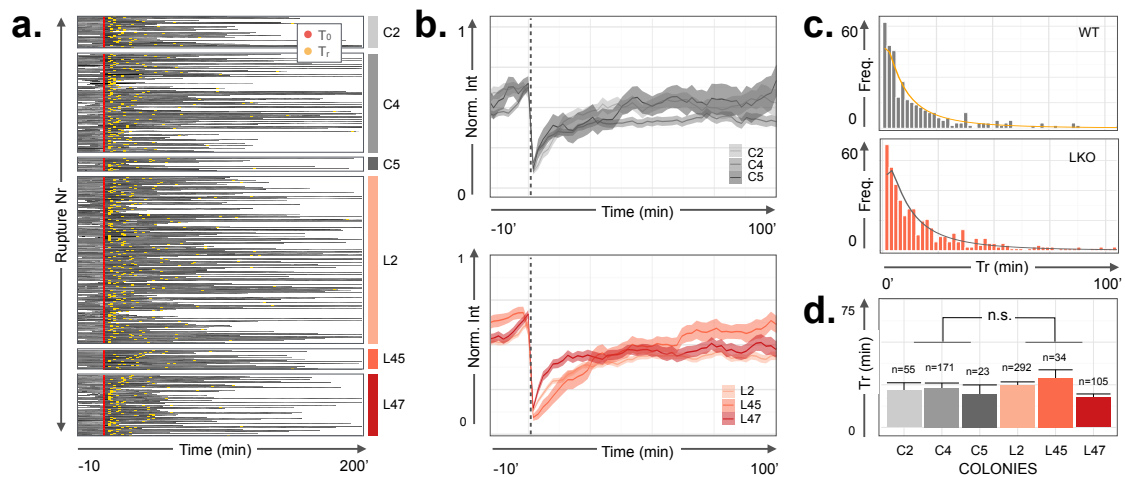

**Figure S4. Rupture kinetics of individual HT-WT and HT-LKO clones.** (a) Individual rupture events synchronized to the moment of nuclear rupture (red) and marked with recovery halftime ( $T_r$ , yellow), grouped per clone. HT-WT clones (C2, C4, C5) are labeled in grey tones and HT-LKO clones (L2, L45, L47) in red tones; (b) Recovery kinetics of nuclear signal after rupture, represented as average signal  $\pm$  standard error (shaded ribbon). Dotted black line indicates moment of rupture; (c) Frequency histogram of recovery halftimes for HT-WT and HT-LKO cells, superimposed with a lognormal MLE-fitted density distribution; (d) Repair halftimes of individual colonies expressed as mean  $\pm$  standard error ( $n$  = number of tracks).

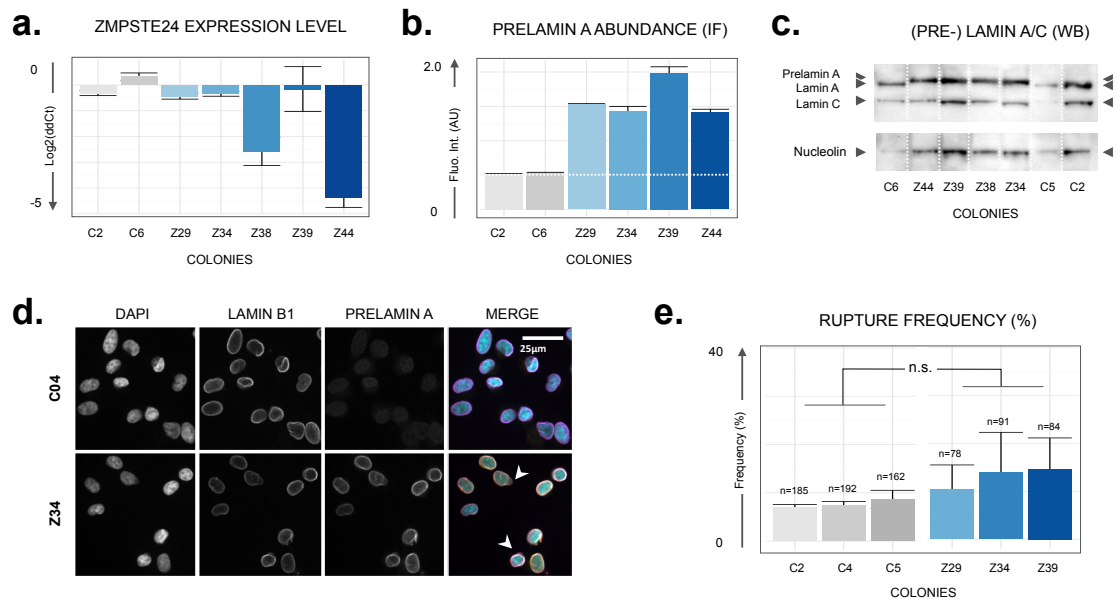

**Figure S5. Characterization of HT-ZKO colonies.** HT-WT colonies (C2, C4, C5, C6) are labeled in grey tones, and HT-ZKO colonies (Z29, Z34, Z38, Z39, Z44) in blue tones. (a) Quantitative PCR shows variable effects on *ZMPSTE24* expression in individual HT-ZKO colonies; (b) Quantitative immunofluorescence (IF) shows significant accumulation of prelamin A above background levels (dotted white line) in HT-ZKO cells; (c) Western blot (WB) for lamin A/C reveals specific accumulation of prelamin A, and absence of mature lamin A in HT-ZKO cells, as shown by the upward shift of the lamin A band as compared to the HT-WT controls; (d) Immunostaining and nuclear counterstaining of HT-ZKO cells reveals their aberrant nuclear morphology (arrowheads) and accumulation of prelamin A; (e) There is no significant increase in rupture frequency in HT-ZKO cell lines as compared to the HT-WT clones. Bar graphs reflect mean  $\pm$  standard error (n = number of tracks).



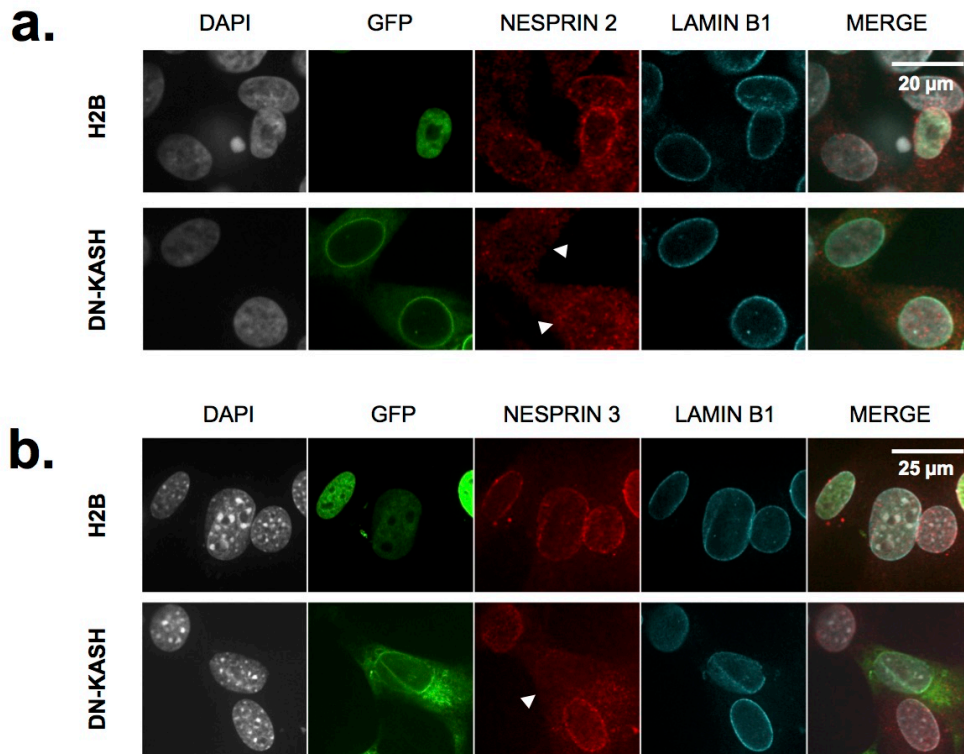

**Figure S6. DN-KASH displaces endogenous nesprins from the nuclear envelope.**

Montages of immunostained HT-WT (a) or MEF-WT (b) cells after transfection with H2B-GFP (top row) or DN-KASH-EGFP (bottom row), respectively. The specific localization of endogenous Nesprin 2 (a) and Nesprin 3 (b) at the nuclear envelope is lost in cells expressing DN-KASH-EGFP (arrowheads), but not in cells expressing H2B-GFP.

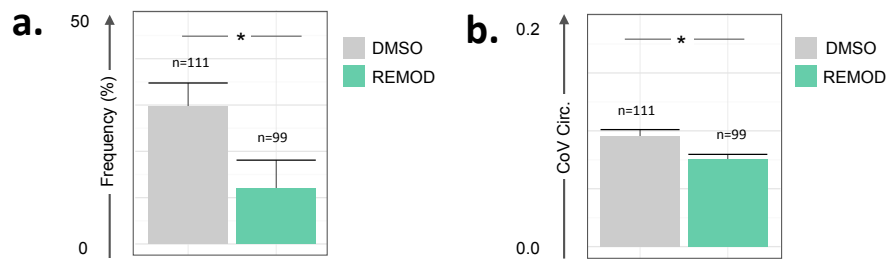

**Figure S7. Remodelin treatment reduces rupture frequency in MEF-LKO cells.** (a) Remodelin significantly ( $p < 0.05$ ) reduces rupture frequency in MEF-LKO cells; (b) Remodelin treatment significantly ( $p < 0.05$ ) reduces the coefficient of variation of nuclear circularity across time. Bar graphs reflect mean  $\pm$  standard error (n = number of tracks).

## Supplementary Movies

**Suppl. Movie 1.** Nuclear ruptures in double transfected MEF-LKO cells appear as a strong increase in the derivative signal of the H2B/NLS signal ratio ( $\Delta H/N$ ). Left panel: H2B-GFP; middle panel: mCherry-NLS; right panel: derivative of the H2B/NLS ratio (DEV).

**Suppl. Movie 2.** Tracking result of MEF-LKO cells undergoing multiple nuclear ruptures. Overlay of the NLS channel and progressive color-coded tracks.

**Suppl. Movie 3.** Nuclear deformation and local chromatin condensation during rupture in double transfected MEF-LKO cells. Left panel: H2B-GFP; middle panel: mCherry-NLS; right panel: merge of H2B (red) and NLS (cyan).

**Suppl. Movie 4.** Nuclear rupture in double transfected HT-LKO cells is not lethal. Left panel: mCherry-NLS; middle panel: H2B-GFP; right panel: merge of H2B (red) and NLS (cyan).
